# Supplementary material for: Shift work and diabetes mellitus: a meta-analysis of observational studies
Source: HighWire-hosted journal article supplement (doi:10.1136/oemed-2014-102150), 2014-07-16
Supplement: oemed-2014-102150supp.pdf [file oemed-2014-102150supp.pdf]

**Supplementary material**

**Supplementary Table 1 Characteristics of studies included in the meta-analysis of shift work in relation to risk of diabetes mellitus**

| Study                | Study design (time period)                | Country | Population (age)        | Population and occupation             | Exposure assessment                                                                                                | Type of shift work | Study outcome and ascertainment                                                                          | NO of cases | Adjustment for confounders                                                                                                                                            | Quality assessment |
|----------------------|-------------------------------------------|---------|-------------------------|---------------------------------------|--------------------------------------------------------------------------------------------------------------------|--------------------|----------------------------------------------------------------------------------------------------------|-------------|-----------------------------------------------------------------------------------------------------------------------------------------------------------------------|--------------------|
| Mikuni et al, 1983   | Cross-sectional                           | Japan   | 2367 men aged mean=38.1 | Factory laborers                      | Shift work was a three shifts                                                                                      | Rotating           | Diabetes identified through self-report and confirmed by Japan Diabetes Society 1970 diagnostic criteria | 37          | No covariate adjustment                                                                                                                                               | 2                  |
| Kawakami et al, 1999 | Prospective cohort (follow up at 8 years) | Japan   | 2194 men aged 18-60     | Workers at a large electrical company | Shift workers engaged in two or three shift work schedules including night shift, with a weekly clockwise rotation | Mixed              | Type 2 diabetes identified through self-report and confirmed by WHO criteria                             | 34          | Age, education, BMI, smoking, alcohol consumption, leisure time physical activity, family history of diabetes mellitus, job strain, social support, use of technology | 8                  |

|                      |                      |        |                     |                                                       |                                                                                   |          |                                                                                                                                                             |     |                                          |   |
|----------------------|----------------------|--------|---------------------|-------------------------------------------------------|-----------------------------------------------------------------------------------|----------|-------------------------------------------------------------------------------------------------------------------------------------------------------------|-----|------------------------------------------|---|
| Nagaya et al, 2002   | Cross-sectional      | Japan  | 3650 men aged 30-59 | Blue-collar workers attending annual health check-ups | Shift workers were defined as the subjects with night work (at least once a week) | Night    | Diabetes identified through medical records and confirmed by Fasting serum glucose $\geq 7.00\text{mmol/l}$ or patient under treatment for diabetes         | 176 | BMI, job, drinking, smoking and exercise | 4 |
| Karlsson et al, 2005 | Retrospective cohort | Sweden | 5442 men aged 10-59 | Workers from two pulp and paper manufacturing plants  | The shift workers worked a three-shift rota                                       | Rotating | Diabetes mortality identified by medical records was confirmed by death certificate diagnosis in the primary or contributory cause-of death fields based on | 158 | Age, duration of employment              | 7 |

|                         |                                                 |       |                        |                                                           |                                                                                                                                                                                               |                      |                                                                                                                                                                                                  |    |                                                                                                                            |   |
|-------------------------|-------------------------------------------------|-------|------------------------|-----------------------------------------------------------|-----------------------------------------------------------------------------------------------------------------------------------------------------------------------------------------------|----------------------|--------------------------------------------------------------------------------------------------------------------------------------------------------------------------------------------------|----|----------------------------------------------------------------------------------------------------------------------------|---|
|                         |                                                 |       |                        |                                                           |                                                                                                                                                                                               |                      | ICD-6~10<br>codes or<br>Diagnosis<br>Related<br>Group codes                                                                                                                                      |    |                                                                                                                            |   |
| Morikawa<br>et al, 2005 | Prospective<br>cohort (follow<br>up at 8 years) | Japan | 2860 men aged<br>19-49 | Blue collar<br>workers<br>in a sash and<br>zipper factory | Rotating two-shift<br>workers did day<br>shifts and evening<br>shifts, and<br>three-shift workers<br>did three-shift<br>continuous<br>(counterclockwise)<br>and three-shift<br>non-continuous | Evening and<br>mixed | Diabetes<br>identified<br>through health<br>examination<br>and medical<br>records and<br>confirmed<br>based on an<br>HbA1c of $\geq$<br>6.1 or clinical<br>judgment<br>of hospital<br>physicians | 87 | Age, BMI, family<br>history,<br>health-related<br>behavior(smoking,<br>habitual drinking,<br>lack of physical<br>exercise) | 8 |

|                        |                                              |         |                                                                         |                                                     |                                                                                                                |          |                                                                                                                                                                                                                                                                                   |     |                                                                                                                  |   |
|------------------------|----------------------------------------------|---------|-------------------------------------------------------------------------|-----------------------------------------------------|----------------------------------------------------------------------------------------------------------------|----------|-----------------------------------------------------------------------------------------------------------------------------------------------------------------------------------------------------------------------------------------------------------------------------------|-----|------------------------------------------------------------------------------------------------------------------|---|
| Suwazono et al, 2006   | Prospective cohort (follow up at 6.69 years) | Japan   | 5629 men aged day shift mean=35.1(9.9) alternating shift mean=37.4(8.8) | Workers in a Japanese steel company                 | The alternating shift workers were working according to a four-team/three shift system with clockwise rotation | Rotating | Diabetes identified through medical records and confirmed based on an HbA1c of $\geq 6.1$ or clinical judgment of hospital physicians<br>Type 2 diabetes identified through self-reports and confirmed by a modification of the criteria of the International Diabetes Federation | 246 | Age, BMI, total serum cholesterol, $\gamma$ -GTP, uric acid, and absence of habitual exercise, drinking, smoking | 8 |
| De Bacquer et al, 2009 | Prospective cohort (follow up at 6.6years)   | Belgium | 1529 men aged 35-59 mean=46.54                                          | Nine different companies and public administrations | Shift workers worked in two or three rotating shifts                                                           | Rotating | Diabetes identified through self-reports and confirmed by a modification of the criteria of the International Diabetes Federation                                                                                                                                                 | 364 | Age, waist circumference, diastolic blood pressure and HDL cholesterol at the initial examination                | 8 |

|                |                                            |               |                                                      |        |                                                                                                                                                        |       |                                                                                                                                                                                                                                   |      |                                                                                                                                                                                                                                       |   |
|----------------|--------------------------------------------|---------------|------------------------------------------------------|--------|--------------------------------------------------------------------------------------------------------------------------------------------------------|-------|-----------------------------------------------------------------------------------------------------------------------------------------------------------------------------------------------------------------------------------|------|---------------------------------------------------------------------------------------------------------------------------------------------------------------------------------------------------------------------------------------|---|
| Pan et al,2011 | Prospective cohort (follow up at 20 years) | United States | 62696 women<br>aged 42-67<br>mean=53.9(7.1)<br>NHS I | Nurses | Shift workers were people who had worked rotating night shifts (defined as at least three nights/month in addition to days and evenings in that month) | Night | Type 2 diabetes identified through self-report diagnosis and confirmed by supplemental questionnaire; National Diabetes Data Group criteria(before 1998)and Association Diabetes Association 1997(after 1998) diagnostic criteria | 6165 | Age, alcohol consumption, physical activity level, smoking status, race ,menopausal status and hormone use, family history of diabetes, current aspirin use, quintiles of total calorie, diabetes dietary score, updated BMI category | 8 |
|----------------|--------------------------------------------|---------------|------------------------------------------------------|--------|--------------------------------------------------------------------------------------------------------------------------------------------------------|-------|-----------------------------------------------------------------------------------------------------------------------------------------------------------------------------------------------------------------------------------|------|---------------------------------------------------------------------------------------------------------------------------------------------------------------------------------------------------------------------------------------|---|

|                 |                                            |               |                                               |        |                                                                                                                                                        |       |                                                                                                                                                                                                                                   |      |                                                                                                                                                                                                                                                                |   |
|-----------------|--------------------------------------------|---------------|-----------------------------------------------|--------|--------------------------------------------------------------------------------------------------------------------------------------------------------|-------|-----------------------------------------------------------------------------------------------------------------------------------------------------------------------------------------------------------------------------------|------|----------------------------------------------------------------------------------------------------------------------------------------------------------------------------------------------------------------------------------------------------------------|---|
| Pan et al, 2011 | Prospective cohort (follow up at 18 years) | United States | 107915 women aged 25-42 mean=34.3(4.7) NHS II | Nurses | Shift workers were people who had worked rotating night shifts (defined as at least three nights/month in addition to days and evenings in that month) | Night | Type 2 diabetes identified through self-report diagnosis and confirmed by supplemental questionnaire; National Diabetes Data Group criteria(before 1998)and Association Diabetes Association 1997(after 1998) diagnostic criteria | 3961 | Age, alcohol consumption, physical activity level , smoking status, race ,menopausal status and hormone use, oral contraceptive use, family history of diabetes, current aspirin use, quintiles of total calorie, diabetes dietary score, updated BMI category | 8 |
|-----------------|--------------------------------------------|---------------|-----------------------------------------------|--------|--------------------------------------------------------------------------------------------------------------------------------------------------------|-------|-----------------------------------------------------------------------------------------------------------------------------------------------------------------------------------------------------------------------------------|------|----------------------------------------------------------------------------------------------------------------------------------------------------------------------------------------------------------------------------------------------------------------|---|

|                      |                                              |        |                               |                                                    |                                                                                                                                                       |             |                                                                                                         |     |                                                                                                                                   |   |
|----------------------|----------------------------------------------|--------|-------------------------------|----------------------------------------------------|-------------------------------------------------------------------------------------------------------------------------------------------------------|-------------|---------------------------------------------------------------------------------------------------------|-----|-----------------------------------------------------------------------------------------------------------------------------------|---|
| Ika et al, 2013      | Cross-sectional                              | Japan  | 475 men aged 19-70            | Workers at a large manufacturing company           | A shift worker was person whose work schedule includes hours day time (8:00 to 16:45 h) for 5-weekday and night shift (21:15 to 6:00 h) for 5-weekday | Night       | Diabetes identified through medical records and confirmed by Japan Diabetes Society diagnostic criteria | 21  | Age, smoking status, frequency of alcohol consumption, and cohabitation status                                                    | 7 |
| Eriksson et al, 2013 | Prospective cohort (follow up at 8-10 years) | Sweden | 5432 men and women aged 35-56 | Middle-aged persons from a population-based cohort | Did you do shift work?                                                                                                                                | Unspecified | Type 2 diabetes identified through self-report and medical checkup and confirmed by WHO criteria        | 149 | Age sex educational level, psychological distress, family history of diabetes, BMI, physical activity, smoking, and civil status, | 8 |

|                 |                 |       |                                  |                                           |                                                                                                                                                                                        |           |                                                                                                                                                                     |      |                                                                                                                                                                                          |   |
|-----------------|-----------------|-------|----------------------------------|-------------------------------------------|----------------------------------------------------------------------------------------------------------------------------------------------------------------------------------------|-----------|---------------------------------------------------------------------------------------------------------------------------------------------------------------------|------|------------------------------------------------------------------------------------------------------------------------------------------------------------------------------------------|---|
| Guo et al, 2013 | Cross-sectional | China | 26463 men and women<br>mean=63.6 | Workers from<br>Tongji-Dongfeng<br>Cohort | Shift<br>work was defined as<br>any work schedule<br>involving unusual or<br>irregular working<br>hours as opposed to<br>a normal daytime<br>work<br>schedule: 8:00 AM<br>to 17:00 PM. | Irregular | Diabetes<br>identified<br>through<br>self-report, use<br>of<br>hypoglycemic<br>drugs and<br>repeated<br>measuring<br>fasting plasma<br>glucose level<br>≥7.0 mmol/l | 3197 | Gender, age , race,<br>marital status, tea<br>consumption, life<br>stress, current<br>smoking status,<br>passive smoking,<br>current drinking<br>status, physical<br>activity and<br>BMI | 8 |
|-----------------|-----------------|-------|----------------------------------|-------------------------------------------|----------------------------------------------------------------------------------------------------------------------------------------------------------------------------------------|-----------|---------------------------------------------------------------------------------------------------------------------------------------------------------------------|------|------------------------------------------------------------------------------------------------------------------------------------------------------------------------------------------|---|

---

Age presented the range with Mean (SD), Abbreviations: BMI, Body mass index; NHS, Nurses' Health Survey; WHO, World Health Organization; HDL, High-density lipoprotein—cholesterol; GTP, Glutamyl transpeptidase



**Supplementary Table 2. Quality assessment of reviewed cohort studies on shift work in relation to diabetes mellitus\***

| Study                  | Selection                                     |                                                       |                                                            | Demonstration that outcome not present at study start | Comparability                                                                                                                                                           |                                                                                   | Outcome                                                |                        |                       |
|------------------------|-----------------------------------------------|-------------------------------------------------------|------------------------------------------------------------|-------------------------------------------------------|-------------------------------------------------------------------------------------------------------------------------------------------------------------------------|-----------------------------------------------------------------------------------|--------------------------------------------------------|------------------------|-----------------------|
|                        | Exposed group represents average in community | The comparison groups from the same source population | Ascertain exposure through records or structured interview |                                                       | There was adequate adjustment for confounding in the analyses from which the main findings were drawn (comparability of cohorts on the basis of the design or analysis) | Ascertain outcome via independent blind assessment or medical records, physicians | Follow-up long enough for outcome to occur (> 5 years) | Loss to follow-up <20% | Overall quality score |
| Kawakami et al. 1999   | 0                                             | 1                                                     | 1                                                          | 1                                                     | 2                                                                                                                                                                       | 1                                                                                 | 1                                                      | 1                      | 8                     |
| Karlsson et al. 2005   | 0                                             | 1                                                     | 1                                                          | 1                                                     | 1                                                                                                                                                                       | 1                                                                                 | 1                                                      | 1                      | 7                     |
| Morikawa et al. 2005   | 0                                             | 1                                                     | 1                                                          | 1                                                     | 2                                                                                                                                                                       | 1                                                                                 | 1                                                      | 1                      | 8                     |
| Suwazono et al. 2006   | 0                                             | 1                                                     | 1                                                          | 1                                                     | 2                                                                                                                                                                       | 1                                                                                 | 1                                                      | 1                      | 8                     |
| De Bacquer et al. 2009 | 1                                             | 1                                                     | 1                                                          | 1                                                     | 1                                                                                                                                                                       | 1                                                                                 | 1                                                      | 1                      | 8                     |
| Pan et al. 2011        | 0                                             | 1                                                     | 1                                                          | 1                                                     | 2                                                                                                                                                                       | 1                                                                                 | 1                                                      | 1                      | 8                     |
| Eriksson et al. 2013   | 1                                             | 1                                                     | 1                                                          | 1                                                     | 2                                                                                                                                                                       | 1                                                                                 | 1                                                      | 0                      | 8                     |

\*The study quality was assessed according to the Newcastle Ottawa Quality assessment scale for cohort studies. This scale awards a maximum of 9 points to each study: 4 for selection, 2 for comparability, and 3 for assessment of outcomes (for cohort study). 1 = "Yes", 0 = "No", "Unable to determine" or "Not available".

**Supplementary Table 3. Quality assessment of reviewed cross-sectional studies on shift work in relation to diabetes mellitus\***

| Study              | 1. Define the source of information (survey, record review) | 2. List inclusion and exclusion criteria for exposed and unexposed subjects (cases and controls) or refer to previous publications | 3. Indicate time period used for identifying patients | 4. Indicate whether or not subjects were consecutive if not population-based | 5. Indicate if evaluators of subjective components of study were masked to other aspects of the status of the participants | 6. Describe any assessments undertaken for quality assurance purposes (e.g., test/retest of primary outcome measurements) | 7. Explain any patient exclusions from analysis | 8. Describe how confounding was assessed and/or controlled | 9. If applicable, explain how missing data were handled in the analysis | 10. Summarize patient response rates and completeness of data collection | 11. Clarify what follow-up, if any, was expected and the percentage of patients for which incomplete data or follow-up was obtained | Overall quality score |
|--------------------|-------------------------------------------------------------|------------------------------------------------------------------------------------------------------------------------------------|-------------------------------------------------------|------------------------------------------------------------------------------|----------------------------------------------------------------------------------------------------------------------------|---------------------------------------------------------------------------------------------------------------------------|-------------------------------------------------|------------------------------------------------------------|-------------------------------------------------------------------------|--------------------------------------------------------------------------|-------------------------------------------------------------------------------------------------------------------------------------|-----------------------|
| Mikuni et al. 1983 | 1                                                           | 0                                                                                                                                  | 0                                                     | 0                                                                            | 0                                                                                                                          | 1                                                                                                                         | 0                                               | 0                                                          | 0                                                                       | 0                                                                        | 0                                                                                                                                   | 2                     |
| Nagaya et al. 2002 | 1                                                           | 1                                                                                                                                  | 0                                                     | 1                                                                            | 0                                                                                                                          | 1                                                                                                                         | 0                                               | 0                                                          | 0                                                                       | 0                                                                        | 0                                                                                                                                   | 4                     |
| Ika et al. 2013    | 1                                                           | 1                                                                                                                                  | 1                                                     | 0                                                                            | 0                                                                                                                          | 1                                                                                                                         | 1                                               | 1                                                          | 0                                                                       | 1                                                                        | 0                                                                                                                                   | 7                     |
| Guo et al. 2013    | 1                                                           | 1                                                                                                                                  | 1                                                     | 1                                                                            | 0                                                                                                                          | 1                                                                                                                         | 1                                               | 1                                                          | 0                                                                       | 1                                                                        | 0                                                                                                                                   | 8                     |

---

\*The study quality was assessed according to the 11 items recommended by the Agency for Healthcare Research and Quality (AHRQ) for cross-sectional studies. 1 point if the item was contemplated in the study, 0 point if the item was not, and unable to determine. 1 = “Yes”, 0 = “No”, “Unable to determine”, or “Not applicable”
